# Supplementary material for: OptimalMe Program: A Mixed Method Investigation into the Engagement and Acceptability of a Preconception Digital Health Lifestyle Intervention with Individual Coaching for Women’s Health and Behaviour Change
Source: MDPI journal article supplement (doi:10.3390/nu16050572), 2024-02-20
Supplement: s1 [file s1]

**Version 2, April 21st 2021, Semi-structured participant interview questions**  
(pre-pregnancy, 3 months post enrolment - interview guide)

Semi-structured interview questions:

|                                                                                                                                                                                                                                                                                                                                                                                                                                                         |
|---------------------------------------------------------------------------------------------------------------------------------------------------------------------------------------------------------------------------------------------------------------------------------------------------------------------------------------------------------------------------------------------------------------------------------------------------------|
| <b>PARTICIPATION/EXPECTATIONS</b>                                                                                                                                                                                                                                                                                                                                                                                                                       |
| 1. To start off with, why did you decide to participate in this program?<br><i>Probe: Preparing for pregnancy, well-being, lifestyle</i>                                                                                                                                                                                                                                                                                                                |
| 2. In your opinion what was the program about?<br><i>Probe: what was your perception about the program purpose</i>                                                                                                                                                                                                                                                                                                                                      |
| <b>LOOK/FEEL/USEABILITY</b>                                                                                                                                                                                                                                                                                                                                                                                                                             |
| 3. Thinking about the Optimal website can you comment on the website's appearance and layout?                                                                                                                                                                                                                                                                                                                                                           |
| <b>INTERACTIVITY/ENGAGEMENT WITH GOAL SETTING</b>                                                                                                                                                                                                                                                                                                                                                                                                       |
| 4. As part of the program you completed goal setting. Did you find goal setting useful?<br>5. Did you review or revisit the Optimal Me website more than once?<br><i>Probe: If yes, what encouraged you to come back to the Optimal Me website? (reviewing and resetting goals/easy to understand/relevant to me)</i><br>6. Is there anything that is missing from the program?                                                                         |
| 7. Were you aware there was a pre-pregnancy health checklist available? Did you use this? Was it helpful?                                                                                                                                                                                                                                                                                                                                               |
| <b>INFORMATION DELIVERY</b>                                                                                                                                                                                                                                                                                                                                                                                                                             |
| 8. Having completed the pre-pregnancy program has your knowledge about pre-pregnancy planning and lifestyle choices improved? If so, can you describe the information that you have learned?                                                                                                                                                                                                                                                            |
| 9. Do you feel that the amount of information provided was sufficient(right) to meet your needs?<br>- If not, what are you looking for? Can identify your needs? More information?<br>- Did the program answer all your pre-pregnancy and healthy lifestyle questions?<br>- Was the information too simple?<br>- Did you want something less self-directed and more prescriptive?<br>- Do you feel the program provided you with adequate support?<br>- |
| 10. Of the delivery modes that were available (online information/text messages/health coaching), what did you enjoy the most? Why?                                                                                                                                                                                                                                                                                                                     |
| <b>HEALTH COACHING (2 sessions) (80% women complete first session and 50% second?)</b>                                                                                                                                                                                                                                                                                                                                                                  |
| 11. Were the one-on-one phone coaching sessions of value to you?<br><i>If attended both phone coaching sessions</i><br><i>Probe: If so why (support/rapport, knowledge/professional, accountability)?</i>                                                                                                                                                                                                                                               |

**Version 2, April 21st 2021, Semi-structured participant interview questions**  
(pre-pregnancy, 3 months post enrolment - interview guide)

|                                                                                                                                                                                                                                                                                                                                                                                                                                                                                                                                                                                  |
|----------------------------------------------------------------------------------------------------------------------------------------------------------------------------------------------------------------------------------------------------------------------------------------------------------------------------------------------------------------------------------------------------------------------------------------------------------------------------------------------------------------------------------------------------------------------------------|
| <p><i>If did not attend the second session</i></p> <ul style="list-style-type: none"> <li>- Why not?</li> <li>- Would a different format have been preferred? (face-to-face, Zoom or email)</li> </ul>                                                                                                                                                                                                                                                                                                                                                                           |
| <p>12. Compared to completing the goal setting online on your own, did you find goal setting more valuable when completing it with the coach? Why?</p>                                                                                                                                                                                                                                                                                                                                                                                                                           |
| <p>13. Would you have preferred group or one on one sessions, or pre-recorded videos?</p>                                                                                                                                                                                                                                                                                                                                                                                                                                                                                        |
| <p><b>REACH/IMPACT/RECOMMENDATIONS TO OTHERS</b></p>                                                                                                                                                                                                                                                                                                                                                                                                                                                                                                                             |
| <p>14. made any changes to your food choices or physical activity since commencing this program? If so, what has changed?</p> <ul style="list-style-type: none"> <li>- Have you been able to maintain this change?</li> </ul> <p>15. Did you share with anyone your learnings from the program?</p> <p><i>Probe: Does anyone close to you know that you have completed the Optimal Me program? (Partners or friends)</i></p> <ul style="list-style-type: none"> <li>- Have you discussed lifestyle or pre-pregnancy health information from this program with anyone?</li> </ul> |
| <p>16. If a partner or support-person version of OptimalMe was available would this be something you think would add value?</p>                                                                                                                                                                                                                                                                                                                                                                                                                                                  |
| <p><b>SATISFACTION AND IMPROVEMENTS</b></p>                                                                                                                                                                                                                                                                                                                                                                                                                                                                                                                                      |
| <p>17. Do you feel more informed after completing this program?</p> <p><i>Probe: In your opinion do you believe this is a valuable and worthwhile program?</i></p> <p>18. Is there anything that could have been done to make your experience better?</p> <p><i>Probe: would an online chat-forum with other women planning pregnancies or trying to conceive assist you?</i></p>                                                                                                                                                                                                |
| <p>19. Are there any others comments you would like to make?</p>                                                                                                                                                                                                                                                                                                                                                                                                                                                                                                                 |
